# Supplementary material for: Прогнозирование уровня потребления мяса и мясопродуктов населением Оренбургской области
Source: Royal Society of Chemistry journal article supplement (doi:10.1039/c9ra08930f), 2012-01-01
Supplement: c9ra08930f1.pdf [file c9ra08930f1.pdf]

## Supporting Information

### **Synthesis of Ag Nanoparticles/Ordered Mesoporous Carbons as Highly Efficient Catalyst for the Electroreduction of Benzyl Bromide**

Zhi-Xia Zhang, Shuo Wang, Shi-Ming Li, Si-Li Shan, Huan Wang\*, Jia-Xing Lu\*

Shanghai Key Laboratory of Green Chemistry and Chemical Processes, School of Chemistry and Molecular Engineering, East China Normal University, Shanghai 200062, P. R. China

[\*] Corresponding author.

Tel: 86 21 52134935. E-mail: [hwang@chem.ecnu.edu.cn](mailto:hwang@chem.ecnu.edu.cn) (Huan Wang)

Tel: 86 21 52134935. E-mail: [jxlu@chem.ecnu.edu.cn](mailto:jxlu@chem.ecnu.edu.cn) (Jia-Xing Lu)

#### **1 Chemicals and instruments**

All reagents were commercially available (Aldrich) and were directly used without further purification.

The X-ray diffraction (XRD) patterns were collected on a Bruker D8 ADVANCE instrument using Cu-K $\alpha$  radiation ( $\lambda = 1.5418 \text{ \AA}$ ) at 35 kV and 25 mA.

The FT-IR spectra were recorded on a Nicolet NEXUS 670 infrared spectrometer.

Thermogravimetric analysis (TGA) was carried out using a Mettler TGA-STA449F3 analyzer from 25 to 800°C in an air flow of 80 mL min<sup>-1</sup> at a heating rate of 10 °C·min<sup>-1</sup>.

The amounts of Ag in OMC were quantified by Inductively Coupled Plasma-Atomic Emission Spectrometry (ICP-AES) on a Thermo IRIS Intrepid II XSP atomic emission spectrometer after dissolving the samples in HNO<sub>3</sub> solution and filtered.

Nitrogen adsorption–desorption isotherms were measured on a Quancachrome Autosorb-3B instrument after evacuating the samples at 573 K for 6 h. The specific surface areas were evaluated using the Brunauer-Emmett-Teller (BET) method and the pore distribution was calculated by the Barrett-Joyner-Halenda (BJH) method from adsorption branches of isotherms.

The Scanning Electron Microscope (SEM) images and Energy Dispersive X-Ray Spectroscopy (EDX) were obtained on a Hitachi S-4800 field-emission scanning microscope.

The Transmission Electron Microscope (TEM) images were recorded using a JEOL-JEM-2010 microscope after the specimens were dispersed in ethanol and placed on holey copper grids.

All electrochemical experiments were performed on a CHI 600C electrochemical work station (Chenhua, Shanghai, China) in an undivided cell

The conversion and selectivity of products were quantified on a Shimadzu GC-2014 GC equipped with a flame ionization detector and a Rtx®-5 column (30 m × 0.25 mm × 0.25 μm) using biphenyl as an internal standard.

## 2 Electrochemical process

Cyclic voltammograms were carried out using a traditional three-electrode system with a GC ( $d = 2$  mm), Ag ( $d = 2$  mm), OMC/GC ( $d = 2$  mm) or Ag/OMC/GC ( $d = 2$  mm) as working electrode, a Pt net as counter electrode and a Ag/AgI/I<sup>-</sup> as reference electrode, in 10 mL MeCN-0.1 M TEABF<sub>4</sub>-5 mM PhCH<sub>2</sub>Br at a scan rate of 0.1 V·s<sup>-1</sup>.

The potentiostatic electrolysis was carried out in a mixture of substrate PhCH<sub>2</sub>Br (0.05 M) and TEABF<sub>4</sub> (0.1 M) in 20 mL solvent (MeCN) under a slow stream of N<sub>2</sub> in an undivided glass cell equipped with a magnesium rod as sacrificial anode, a Ag/AgI/I<sup>-</sup> as reference electrode and a Ag, OMC or Ag/OMC as working electrode until 1-1.5 F/mol of charge was passed. The reaction mixture was hydrolyzed and extracted with Et<sub>2</sub>O, and the organic layers was washed with H<sub>2</sub>O, dried over MgSO<sub>4</sub>, and filtered. The products were analyzed by gas chromatography to obtain the yields based on the starting materials.

The electrochemically active surface area of working electrodes was determined by measuring the charge associated with the stripping of an underpotential deposited (UPD) Pb monolayer. The electrodes were immersed in an aqueous HClO<sub>4</sub> (0.1 M) solution containing

$\text{Pb}(\text{ClO}_4)_2$  (1 mM) purged with  $\text{N}_2$  in an electrochemical cell with a Pt counter electrode and an Ag/AgCl (1 M KCl) reference electrode. Cyclic voltammograms from 0.0~−0.45 V with a scan rate of  $50 \text{ mV}\cdot\text{s}^{-1}$  were acquired until traces converged. The charge corresponding to full coverage of lead on silver is  $400 \text{ }\mu\text{C}\cdot\text{cm}^{-2}$ . [1]

### 3 Small-angle XRD pattern of the Ag-free mesoporous carbon sample (OMC)

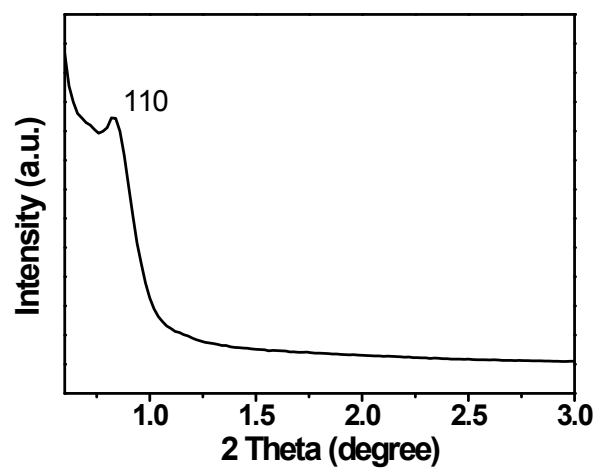

**Fig. S1** Small-angle XRD pattern of the Ag-free mesoporous carbon sample.

#### 4 FT-IR of Ag/OMC

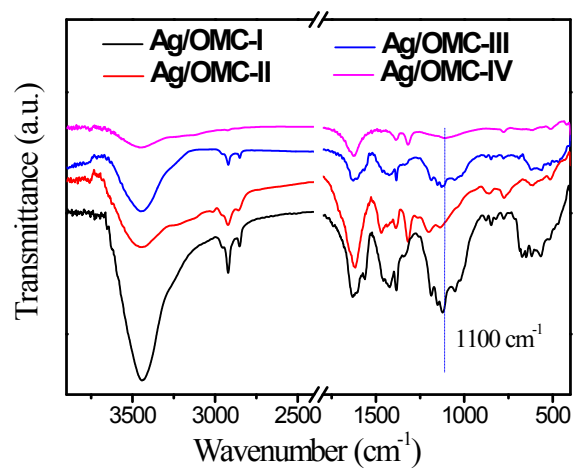

**Fig. S2** FT-IR spectra of the ordered mesoporous carbon/nanoparticle Ag composites with different Ag contents.

## 5 TGA of Ag/OMC

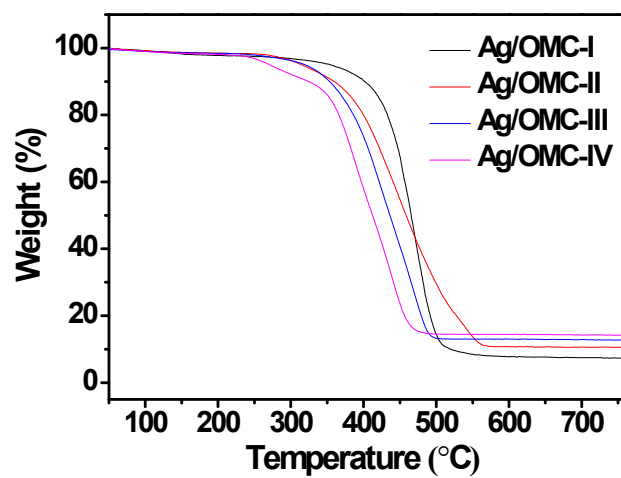

**Fig. S3** TGA curves recorded in air of the ordered mesoporous carbon/nanoparticle Ag composites with different Ag contents.

## 6 XRD of as-made-Ag/OMC

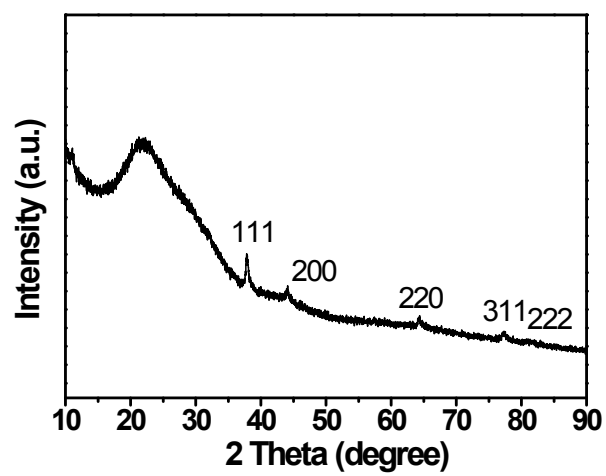

**Fig. S4** Wide-angle XRD pattern of the as-made-Ag/OMC-III sample.



## 7 SEM of Ag/OMC and OMC

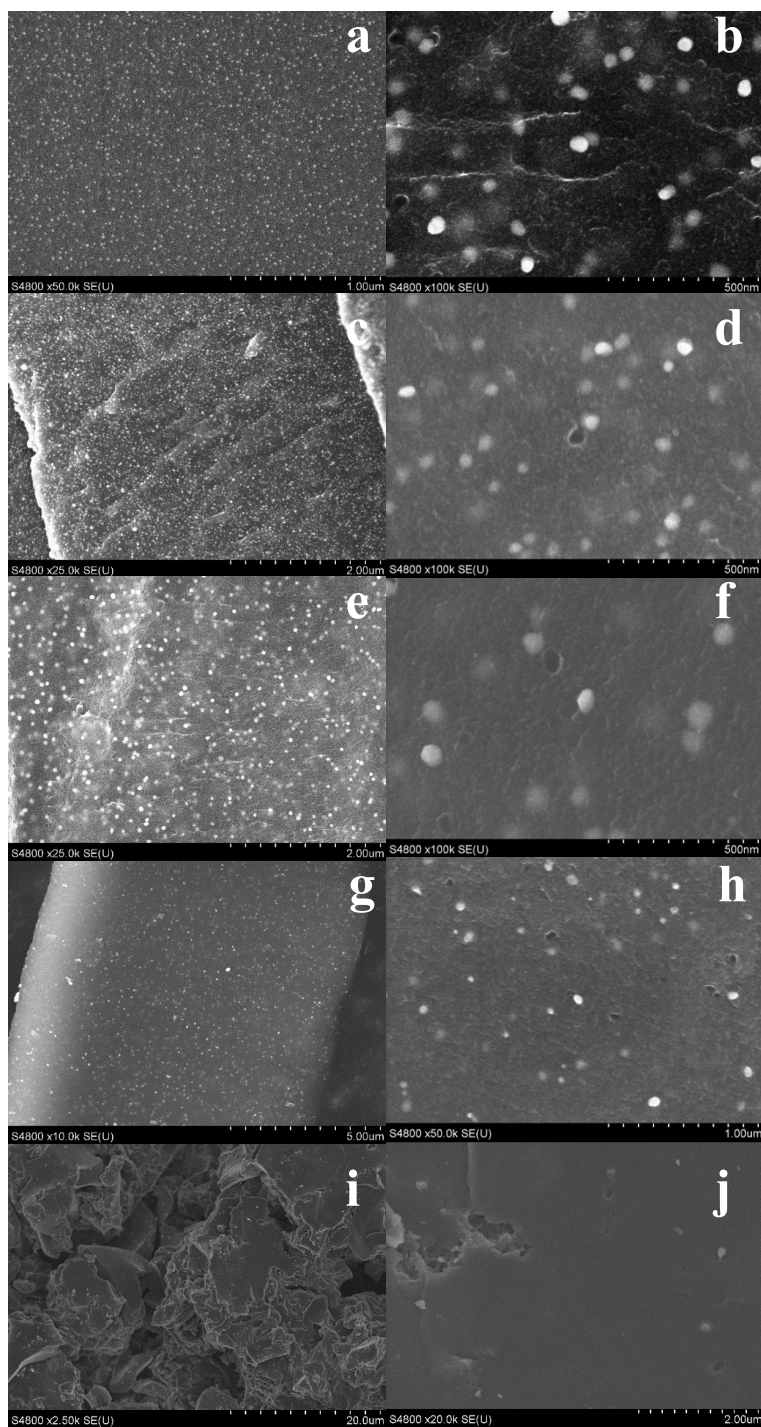

**Fig. S5** SEM images of the Ag/OMC and OMC: (a, b) Ag/OMC-I, (c, d) Ag/OMC-II, (e, f) Ag/OMC-III, (g, h) Ag/OMC-IV, (i, j) OMC.

## 8 EDX-Mapping of Ag/OMC

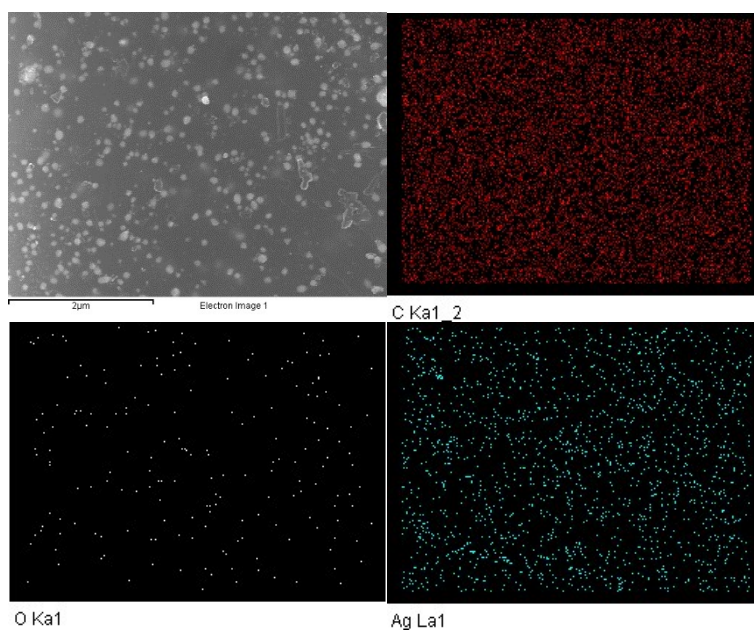

**Fig. S6** EDX-Mapping images of Ag/OMC-III.

## 9 Magnified TEM image

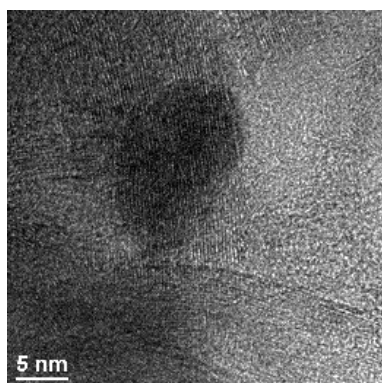

**Fig. S7** Magnified TEM image of Ag/OMC-III.

## 10 Cyclic voltammograms of OMC

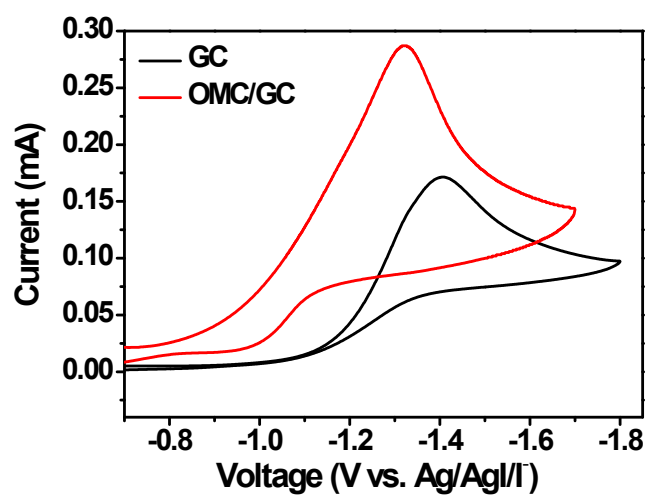

**Fig. S8** Cyclic voltammograms recorded at a scan rate of  $0.1\text{V}\cdot\text{s}^{-1}$  using different electrode in MeCN-0.1 M TEABF<sub>4</sub>-5 mM PhCH<sub>2</sub>Br.

## 11 Pb-UPD

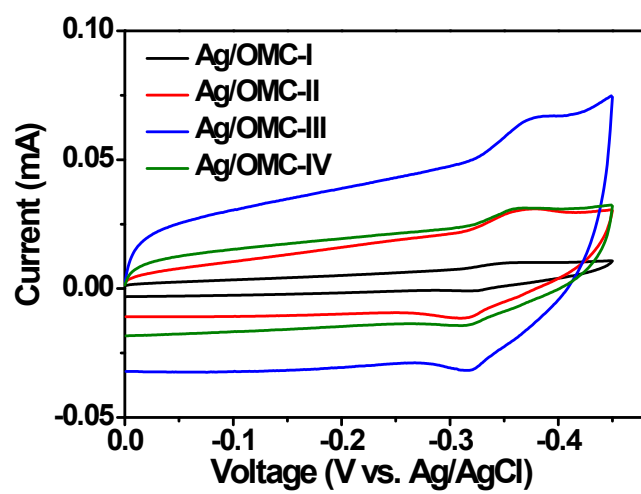

**Fig. S9** Cyclic voltammograms recorded at a scan rate of  $50 \text{ mV} \cdot \text{s}^{-1}$  using different electrode in  $\text{H}_2\text{O}$ - $0.1 \text{ M HClO}_4$ - $1 \text{ mM Pb}(\text{ClO}_4)_2$ .

## 12 Characterization of Ag/OMC- III after using 8 times

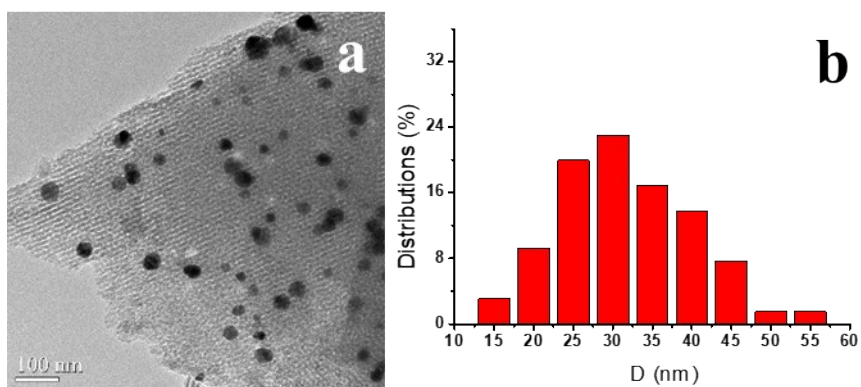

**Fig. S10** TEM images (a) and grain diameter distribution maps (b) of Ag/OMC- III after using 8 times.

### References

1. E. Kirowa-Eisner, D. Tzur and E. Gileadi, *Journal of Electroanalytical Chemistry*, 2008, **621**, 146-158.
